# Supplementary material for: Chemoselective hydrogenation of heteroarenes and arenes by Pd–Ru–PVP under mild conditions
Source: Royal Society of Chemistry journal article supplement (doi:10.1039/d0ra09981c), 2020-01-01
Supplement: d0ra09981c1.pdf [file d0ra09981c1.pdf]

## Chemoselective hydrogenation of heteroarenes and arenes by Pd-Ru-PVP under mild reaction conditions

Chandan Chaudhari,<sup>\*a</sup> Katsutoshi Sato,<sup>a,b</sup> Yoshihide Nishida,<sup>a</sup> Tomokazu Yamamoto,<sup>c</sup> Takaaki Toriyama,<sup>d</sup> Syo Matsumura,<sup>c,d</sup> Yasuyuki Ikeda,<sup>e</sup> Kenji Terada,<sup>e</sup> Naoya Abe,<sup>e</sup> Kohei Kusuda,<sup>f</sup> Hiroshi Kitagawa,<sup>f</sup> Katsutoshi Nagaoka<sup>\*a</sup>

<sup>a</sup>Department of chemical systems engineering, graduate school of engineering, Nagoya university, Furo-cho, Chikusa-ku, Nagoya, 464-8603, Japan.

<sup>b</sup>Elements Strategy Initiative for Catalysts and Batteries, Kyoto University, Katsura, Kyoto 615-8520, Japan.

<sup>c</sup>Department of Applied Quantum Physics and Nuclear Engineering, Kyushu University, Motooka 744, Nishi-ku, Fukuoka 819-0395 Japan

<sup>d</sup>The Ultramicroscopy Research Center, Kyushu University, 744 Motooka, Nishi-ku, Fukuoka 819-0395, Japan

<sup>e</sup>Furuya Metal Co., Ltd, Higashitsukuba Niihari Kogyodanchi, 57-4, Sawabe, Tsuchiura City, Ibaraki 300-4104, Japan.

<sup>f</sup>Division of Chemistry, Graduate School of Science Kyoto University Kitashirakawa-Oiwakecho, Sakyo-ku, Kyoto 606-8502 Japan

\*Corresponding authors.

E-mail address: nagaoka.katsutoshi@material.nagoya-u.ac.jp

E-mail address: chaudhari.chandan.subhash@d.mbox.nagoya-u.ac.jp

## Experimental Section

### General

All chemicals were obtained from Tokyo Chemical Industry and Wako Pure Chemical Industries, Japan and were used without further purification.

### Catalyst preparation

#### i) Wet chemical reduction method

Polyvinylpyrrolidone (PVP)-stabilized monometallic (Pd, Ru) and bimetallic (Pd<sub>0.5</sub>-Ru<sub>0.5</sub>) catalysts were prepared by using a wet reduction method.<sup>S1</sup> In a typical procedure, an appropriate amount of metal chloride precursor (1 equivalent) was dissolved in deionized water. Five equivalents of PVP were added to ethylene glycol, and the mixture was heated to 200 °C. An aqueous solution of metal precursor was added slowly to the ethylene glycol at 200 °C. After the addition was complete, the temperature of the mixture was maintained for 30 min, and then the mixture was cooled to room temperature. The prepared nanoparticles were separated by centrifuging. The bimetallic (Pd<sub>0.5</sub>-Ru<sub>0.5</sub>) catalyst was prepared by controlling the molar ratio of Pd<sup>2+</sup> and Ru<sup>3+</sup> ions.

#### ii) Microwave-assisted, wet chemical reduction method

In a standard procedure, metal chloride (1 equivalent) and PVP (5 equivalents) were dissolved in ethylene glycol.<sup>S2</sup> After purging with Ar, the vessel was sealed and heated to 180 °C by microwave irradiation (400 W) for 15 min. The resultant black suspension was separated by centrifuging.

**Table S1. Preparation procedure of various metal NPs**

| Metal (M) | Preparation method                         | M-PVP <sup>a</sup> (%) |
|-----------|--------------------------------------------|------------------------|
| Pd        | Wet chemical reduction                     | 29                     |
| Ru        | Wet chemical reduction                     | 55                     |
| Pd-Ru     | Wet chemical reduction                     | 40                     |
| Rh        | Micro-wave assisted wet chemical reduction | 82                     |

<sup>a</sup>Calculated by thermogravimetric analysis

### Catalyst characterization

High-angle, annular, dark-field scanning transmission electron microscopy images and elemental mappings via energy-dispersive X-ray analysis were obtained on a JEM-ARM200F electron microscope (JEOL, Japan) operated at 120 kV. X-ray photoelectron spectroscopy analysis was carried out using an ESCA-3400 (Shimadzu, Kyoto, Japan). The PVP amount was estimated by using thermogravimetric analysis (ThermoPlus; Rigaku, Japan).

### General procedure for the hydrogenation of heteroarenes and arenes

All reactions were carried out in a 10-mL autoclave using a glass tube and magnetic stirrer. In a standard run, substrate (1 mmol), solvent (1 mL), and catalyst (1.4 mol%) were added to the reactor. In the case of an arene substrate, no solvent was used. Next, the reactor was purged with H<sub>2</sub> gas multiple times, and the reactor was pressurized (5–10 bar). The reaction of heteroarenes was carried out at room temperature with constant stirring. For arenes, the reactor was heated to 150 °C with constant stirring. After completion of the reaction, the catalyst was separated with a syringe micro-filter. The conversion of substrate and yield of product were calculated using internal standards with a gas chromatograph (Shimadzu 2014) equipped with a flame-ionization detector.

**Table S2. Comparison between reported results and the results with our catalytic methods for the hydrogenation of quinoline**

| Entry | Catalyst (mol %)                              | H <sub>2</sub> (bar)   | Temp. (°C) | Reaction time (h) | TOF (h <sup>-1</sup> ) | Substrate scope                                            | Ref.             |
|-------|-----------------------------------------------|------------------------|------------|-------------------|------------------------|------------------------------------------------------------|------------------|
| 1     | CoCl <sub>2</sub> (5)                         | NaBH <sub>4</sub>      | 130        | 17                | 1.1                    | <i>N</i> -heteroarenes                                     | 7                |
| 2     | Au/HAS-TiO <sub>2</sub> (1)                   | 20                     | 80         | 3.5               | 28.5                   | <i>N</i> -heteroarenes                                     | 8                |
| 3     | Ru-SiO <sub>2</sub> @mSiO <sub>2</sub> (0.67) | 30                     | 90         | 5                 | 29.8                   | <i>N</i> -heteroarenes                                     | 9                |
| 4     | Ru-NPs in IL (2)                              | 10                     | 80         | 19                | 2.6                    | <i>N</i> -heteroarenes                                     | 10               |
| 5     | Pd-pol (0.5)                                  | 10                     | 80         | 9                 | 22.2                   | <i>N</i> -heteroarenes                                     | 11               |
| 6     | Pt (5)                                        | H <sub>2</sub> balloon | 25         | 1.33              | 15                     | <i>N</i> -heteroarenes                                     | 12               |
| 7     | Rh/AlO(OH) (1.5)                              | 8                      | 80         | 3                 | 22.2                   |                                                            | 13               |
| 8     | BWT <sub>1.5</sub> -Rh (1)                    | 20                     | 80         | 0.5               | 200                    | <i>N</i> -heteroarenes                                     | 14               |
| 9     | Rh NPs (1.8)                                  | 30                     | 50         | 5                 | 20                     | <i>N</i> -heteroarenes                                     | 15               |
| 10    | PEG <sub>4000</sub> -Rh NPs (0.1)             | 30                     | 100        | 6                 | 323                    | <i>N</i> -heteroarenes                                     | 16               |
| 11    | Rh NPs (1)                                    | 30                     | 80         | 15                | 2.08                   | <i>N</i> -heteroarenes, <i>O</i> -heteroarenes             | 17               |
| 12    | Rh@Fe <sub>2</sub> O <sub>3</sub> (0.9)       | 20                     | 50         | 2                 | 54                     | <i>N</i> -heteroarenes                                     | 18               |
| 13    | NHC-Rh (0.62)                                 | 20                     | 30         |                   | 238                    | <i>N</i> -heteroarenes, arenes                             | 19               |
| 14    | Rh NP-rGO (1)                                 | 10                     | 80         | 12                | 4.16                   | <i>N</i> -heteroarenes, <i>O</i> -heteroarenes             | 20               |
| 15    | Rh-C60 (0.6)                                  | 20                     | 100        | 4                 | 164.3                  | <i>N</i> -heteroarenes                                     | 21               |
| 16    | Rh/AlO(OH) (1)                                | 1                      | 25         | 6                 | 3.1                    | <i>N</i> -heteroarenes, arenes                             | 22               |
| 17    | Rh/AlO(OH) (5)                                | 1                      | 22         | 6                 | 9                      | <i>N</i> -heteroarenes, arenes                             | 23               |
| 18    | HEA16Cl-Rh (1)                                | 1                      | 25         | 10.4              | 10.9                   | <i>N</i> -heteroarenes, <i>O</i> -heteroarenes             | 24               |
| 19    | <b>Pd-Ru-PVP (2)</b>                          | <b>5</b>               | <b>25</b>  | <b>6</b>          | <b>8.3</b>             | <b><i>N</i>-heteroarenes, <i>O</i>-heteroarene, arenes</b> | <b>This work</b> |

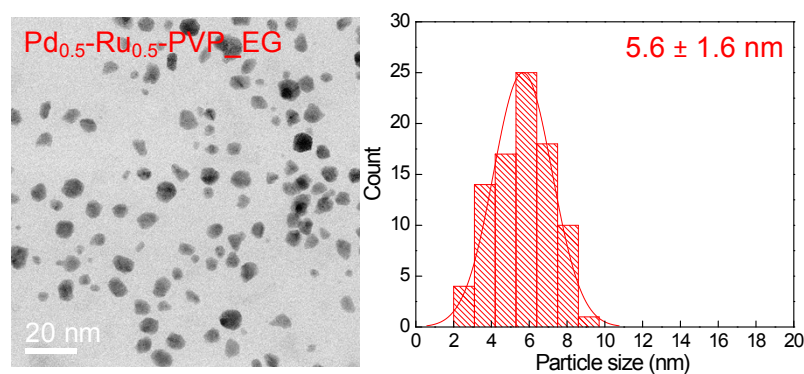

Figure S1. High-resolution STEM image and size distribution of the Pd<sub>0.5</sub>Ru<sub>0.5</sub>-PVP catalyst.

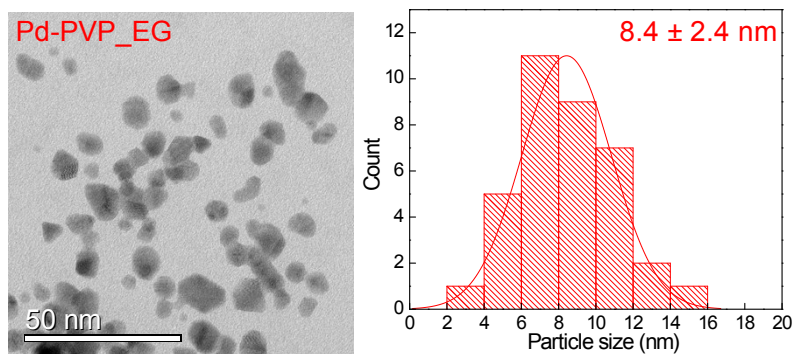

Figure S3. High-resolution STEM image and size distribution of the Pd-PVP catalyst.

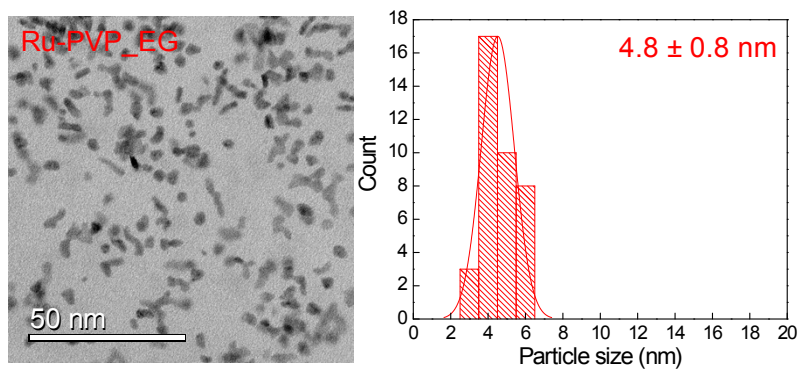

Figure S4. High-resolution STEM image and size distribution of the Ru-PVP catalyst.

## References

- <sup>S1</sup>K. Kusada, H. Kobayashi, R. Ikeda, Y. Kubota, M. Takata, S. Toh, T. Yamamoto, S. Matsumura, N. Sumi, K. Sato, K. Nagaoka and H. Kitagawa, *J. Am. Chem. Soc.*, 2014, **136**, 1864-1871.
- <sup>S2</sup>C. Chaudhari, H. Imatome, Y. Nishida, K. Sato and K. Nagaoka, *Catal. Commun.*, 2019, **126**, 55–60.
